# Supplementary material for: Axonal sodium channel NaV1.2 drives granule cell dendritic GABA release and rapid odor discrimination
Source: PLoS Biol. 2018 Aug 20;16(8):e2003816. doi: 10.1371/journal.pbio.2003816 (PMC6117082; doi:10.1371/journal.pbio.2003816)
Supplement: S1 Data — Excel spreadsheet containing, in separate sheets, the underlying numerical data for Figs panels 1D, 1E, 2H, 3B, 3F, 3H, 4C, 5A, 5B, 5C, 5D, S3C, S3F, S4B, S4C, S4D, S4E, S6D, S6E, S6G, S6H, S7A, S7B, S8A and S8B. (XLSX) [file pbio.2003816.s009.xlsx]

## Sheet: Fig1DE
Fig 1 DE
Absolute Quantification								Intensity Ratio (NaV1.x/NaV2.1)
Subunit	2.1	1.1	1.2	1.3	1.6	1.7		1.1	1.2	1.3	1.6	1.7
EPL	49	63	66	57	52	9		1.32283	1.38583	1.19685	1.09186	0.188976
	45	56	64	56	55	9		1.17585	1.34383	1.17585	1.15486	0.188976
	49	49	63	59	49	9		1.02887	1.32283	1.23885	1.02887	0.188976
	44	60	67	58	42	5		1.25984	1.40682	1.21785	0.88189	0.104987
	52	71	74	50	48	8		1.49081	1.55381	1.04987	1.00787	0.167979
	44	52	68	48	53	8		1.09186	1.42782	1.00787	1.11286	0.167979
	45	52	66	49	57	7		1.09186	1.38583	1.02887	1.19685	0.146982
	53	53	67	52	58	7		1.11286	1.40682	1.09186	1.21785	0.146982
mean	47.625	57	66.875	53.625	51.75	7.75
STDV	3.62284	7.28991	3.31393	4.37321	5.28475	1.38873
Glu	49	62	73	85	58	27		1.16706	1.37412	1.6	1.09176	0.508235
	63	47	75	74	57	31		0.884706	1.41176	1.39294	1.07294	0.583529
	31	45	75	75	60	60		0.847059	1.41176	1.41176	1.12941	1.12941
	65	53	80	59	47	30		0.997647	1.50588	1.11059	0.884706	0.564706
	60	69	56	70	50	29		1.29882	1.05412	1.31765	0.941176	0.545882
	72	60	55	71	39	74		1.12941	1.03529	1.33647	0.734118	1.39294
	43	52	55	62	52	57		0.978824	1.03529	1.16706	0.978824	1.07294
	42	35	61	66	41	20		0.658824	1.14824	1.24235	0.771765	0.376471
mean	53.125	52.875	66.25	70.25	50.5	41
STDV	14.0147	10.7629	10.5119	8.17225	7.8011	19.6687
GLC	44	66	65	49	61	9		1.31671	1.29676	0.977556	1.21696	0.179551
	47	69	102	54	62	8		1.37656	2.03491	1.07731	1.23691	0.159601
	48	66	85	50	57	8		1.31671	1.69576	0.997506	1.13716	0.159601
	48	60	98	51	51	6		1.19701	1.95511	1.01746	1.01746	0.119701
	59	83	68	49	59	7		1.65586	1.35661	0.977556	1.17706	0.139651
	58	86	69	55	60	5		1.71571	1.37656	1.09726	1.19701	0.0997506
	54	85	87	52	60	8		1.69576	1.73566	1.03741	1.19701	0.159601
	43	64	69	47	39	9		1.27681	1.37656	0.937656	0.778055	0.179551
mean	50.125	72.375	80.375	50.875	56.125	7.5
STDV	6.1281	10.5144	14.5988	2.6959	7.7171	1.41421
MCL	44	88	71	61	55	8		1.78862	1.44309	1.23984	1.11789	0.162602
	53	110	62	55	53	6		2.23577	1.26016	1.11789	1.07724	0.121951
	56	101	72	54	63	7		2.05285	1.46341	1.09756	1.28049	0.142276
	49	78	70	52	58	5		1.58537	1.42276	1.05691	1.17886	0.101626
	44	80	62	60	58	8		1.62602	1.26016	1.21951	1.17886	0.162602
mean	49.2	91.4	67.4	56.4	57.4	6.8
STDV	5.35724	13.7768	4.97996	3.91152	3.78153	1.30384

## Sheet: Fig2H
Fig 2H
	cell body 1		dendrite GCL 1			cell body 2		dendrite GCL 2				cell body 3		dendrite GCL 3				cell body 4		dendrite GCL 4				cell body 5		dendrite GCL 5				EPL dendrites 1			EPL dendrites 2			EPL dendrites 3			EPL dendrites 4			EPL dendrites 5			spine heads_1			spine heads_2
	mGFP	nav1.2	mGFP	nav1.2		mGFP	nav1.2	mGFP	nav1.2			mGFP	nav1.2	mGFP	nav1.2			mGFP	nav1.2	mGFP	nav1.2			mGFP	nav1.2	mGFP	nav1.2			mGFP	nav1.2		mGFP	nav1.2		mGFP	nav1.2		mGFP	nav1.2		mGFP	nav1.2		mGFP	nav1.2		mGFP	nav1.2
	total area	total area	total area	total area		total area	total area	total area	total area			total area	total area	total area	total area			total area	total area	total area	total area			total area	total area	total area	total area			total area	total area		total area	total area		total area	total area		total area	total area		total area	total area		total area	total area		total area	total area
Stack #	3.19e-09	1.111e-09	4.616e-08	2.416e-08		1.742e-08	1.003e-09	0	0			2.903e-09	6.451e-10	2.831e-09	1.434e-09			1.753e-08	7.132e-09	0	0			1.484e-08	6.236e-09	9.36e-10	0			9.785e-09	1.111e-09		7.1e-08	3.888e-08		2.79e-08	3.534e-08		4.02e-08	3.53e-08		3.254e-07	1.993e-07		2.616e-09	1.183e-09		1.076e-07	6.412e-08
1	3.154e-09	7.168e-10	4.373e-08	2.262e-08		1.803e-08	1.326e-09	0	0			2.939e-09	3.584e-10	2.724e-09	1.72e-09			1.699e-08	6.272e-09	0	0			1.34e-08	5.77e-09	1.26e-09	0			1.154e-08	1.111e-09		6.37e-08	3.509e-08		2.92e-08	3.595e-08		3.96e-08	3.6e-08		2.997e-07	1.79e-07		3.011e-09	1.111e-09		1.055e-07	5.975e-08
2	1.541e-09	1.434e-10	3.928e-08	2.165e-08		2.222e-08	2.652e-09	0	0			3.011e-09	6.451e-10	3.082e-09	1.9e-09			1.817e-08	6.451e-09	0	0			1.208e-08	5.519e-09	1.908e-09	0			1.125e-08	1.434e-09		5.52e-08	2.835e-08		3.06e-08	3.67e-08		3.58e-08	3.67e-08		2.837e-07	1.712e-07		3.512e-09	1.47e-09		1.074e-07	6.19e-08
3	1.649e-09	3.226e-10	1.692e-08	1.495e-08		2.695e-08	4.587e-09	0	0			3.082e-09	7.168e-10	3.118e-09	2.043e-09			2.014e-08	6.81e-09	0	0			1.122e-08	3.727e-09	3.204e-09	0			1.369e-08	1.649e-09		4.86e-08	2.437e-08		3.07e-08	3.917e-08		3.53e-08	3.92e-08		2.686e-07	1.581e-07		4.086e-09	2.079e-09		1.087e-07	6.003e-08
4	7.312e-09	4.301e-10	6.093e-09	8.1e-09		3.139e-08	4.587e-09	0	0			3.441e-09	1.004e-09	3.692e-09	2.545e-09			2.251e-08	7.813e-09	0	0			8.853e-09	2.365e-09	5.76e-09	1.075e-10			1.548e-08	2.437e-09		4.45e-08	2.215e-08		2.96e-08	4.082e-08		3.39e-08	4.08e-08		2.527e-07	1.47e-07		3.871e-09	2.258e-09		1.069e-07	5.81e-08
5	1.72e-08	1.039e-09	5.914e-09	8.172e-09		3.519e-08	5.197e-09	0	0			3.62e-09	1.326e-09	3.692e-09	2.616e-09			2.459e-08	7.204e-09	0	0			7.168e-09	2.079e-09	6.804e-09	2.509e-10			1.62e-08	2.186e-09		4.29e-08	2.265e-08		3e-08	4.76e-08		3.34e-08	4.76e-08		2.344e-07	1.369e-07		4.48e-09	2.258e-09		1.069e-07	5.896e-08
6	2.104e-08	7.885e-10	1.469e-09	3.477e-09		4.103e-08	6.092e-09	0	0			4.516e-09	1.219e-09	3.871e-09	2.867e-09			2.588e-08	7.275e-09	0	0			5.878e-09	1.219e-09	9.54e-09	2.867e-10			1.853e-08	2.939e-09		4.13e-08	2.082e-08		3.31e-08	4.867e-08		3.77e-08	4.87e-08		2.173e-07	1.266e-07		5.34e-09	2.867e-09		1.062e-07	5.795e-08
7	2.663e-08	1.075e-09	1.075e-10	1.147e-09		5.182e-08	7.418e-09	0	0			5.161e-09	1.183e-09	3.082e-09	2.186e-09			2.817e-08	7.49e-09	0	0			4.48e-09	9.319e-10	1.253e-08	6.451e-10			1.989e-08	4.014e-09		3.97e-08	2.025e-08		3.51e-08	5.383e-08		4.41e-08	5.38e-08		2.083e-07	1.173e-07		5.269e-09	2.975e-09		1.043e-07	5.605e-08
8	2.641e-08	1.505e-09	1.075e-10	2.867e-10		5.827e-08	8.458e-09	0	0			7.204e-09	1.075e-09	3.154e-09	1.792e-09			3.046e-08	8.422e-09	0	0			4.337e-09	7.527e-10	1.505e-08	1.039e-09			2.391e-08	3.978e-09		3.97e-08	2.157e-08		3.51e-08	5.839e-08		5.2e-08	5.84e-08		1.975e-07	1.111e-07		5.986e-09	3.369e-09		1.018e-07	5.595e-08
9	2.545e-08	1.828e-09	4.659e-10	7.168e-11		6.53e-08	9.497e-09	0	0			1.172e-08	1.29e-09	2.76e-09	1.792e-09			3.079e-08	9.247e-09	0	0			3.118e-09	2.867e-10	1.962e-08	1.29e-09			2.606e-08	4.337e-09		4.09e-08	2.269e-08		3.56e-08	6.555e-08		6.09e-08	6.56e-08		1.892e-07	1.065e-07		5.663e-09	3.548e-09		9.992e-08	5.527e-08
10	2.233e-08	2.007e-09	9.319e-10	3.584e-10		7.031e-08	1.1e-08	0	0			1.989e-08	2.043e-09	1.792e-09	1.684e-09			3.555e-08	1.004e-08	0	0			3.082e-09	3.226e-10	2.351e-08	2.043e-09			3.086e-08	6.021e-09		4.2e-08	2.258e-08		3.85e-08	7.304e-08		7.54e-08	7.3e-08		1.888e-07	1.016e-07		7.061e-09	4.086e-09		1.014e-07	5.38e-08
11	1.771e-08	1.828e-09	4.301e-10	3.584e-10		7.472e-08	9.569e-09	0	0			2.609e-08	3.512e-09	1.864e-09	1.828e-09			3.681e-08	1.158e-08	0	0			2.115e-09	1.792e-10	2.596e-08	1.864e-09			3.383e-08	8.136e-09		4.36e-08	2.243e-08		3.7e-08	7.652e-08		8.99e-08	7.65e-08		1.818e-07	9.462e-08		6.989e-09	3.835e-09		9.946e-08	5.308e-08
12	1.745e-08	2.294e-09	7.527e-10	2.509e-10		8.031e-08	9.21e-09	0	0			3.527e-08	5.949e-09	1.326e-09	1.72e-09			4.129e-08	1.279e-08	0	0			2.365e-09	2.867e-10	3.193e-08	3.297e-09			3.426e-08	9.749e-09		4.59e-08	2.294e-08		3.88e-08	8.401e-08		1.15e-07	8.4e-08		1.744e-07	8.982e-08		7.419e-09	4.982e-09		9.802e-08	4.964e-08
13	1.477e-08	1.971e-09	3.943e-10	3.584e-10		8.318e-08	8.064e-09	1.434e-10	1.434e-10			4.2e-08	7.096e-09	1.649e-09	2.115e-09			4.441e-08	1.193e-08	0	0			2.294e-09	4.301e-10	3.809e-08	4.122e-09			3.645e-08	1.254e-08		4.94e-08	2.312e-08		4.36e-08	9.659e-08		1.46e-07	9.66e-08		1.666e-07	8.136e-08		7.742e-09	5.591e-09		9.853e-08	4.72e-08
14	1.538e-08	2.796e-09	1.434e-10	4.301e-10		8.744e-08	7.705e-09	2.294e-09	1.649e-09			5.064e-08	1.072e-08	2.724e-09	3.584e-09			4.677e-08	1.179e-08	0	0			3.19e-09	6.451e-10	4.507e-08	5.269e-09			3.76e-08	1.419e-08		5.08e-08	2.197e-08		5.07e-08	1.039e-07		1.82e-07	1.04e-07		1.65e-07	7.716e-08		7.993e-09	5.771e-09		9.709e-08	4.67e-08
15	1.627e-08	2.76e-09	3.584e-11	6.451e-10		9.06e-08	8.243e-09	9.891e-09	5.877e-09			6.268e-08	1.355e-08	3.978e-09	4.552e-09			5.415e-08	1.294e-08	0	0			4.874e-09	1.111e-09	5.936e-08	6.702e-09			4.14e-08	1.649e-08		5.81e-08	2.082e-08		5.56e-08	1.069e-07		2.2e-07	1.07e-07		1.593e-07	7.147e-08		8.136e-09	5.878e-09		9.845e-08	4.494e-08
16	1.72e-08	2.76e-09	6.81e-10	1.004e-09		9.501e-08	9.282e-09	1.91e-08	1.261e-08			7.716e-08	1.577e-08	5.161e-09	5.519e-09			6.222e-08	1.326e-08	0	0			5.054e-09	1.29e-09	6.995e-08	7.742e-09			4.373e-08	1.806e-08		6.3e-08	2.129e-08		6.24e-08	1.122e-07		2.52e-07	1.12e-07		1.581e-07	6.971e-08		8.494e-09	6.093e-09		9.745e-08	4.459e-08
17	2.387e-08	4.193e-09	1.398e-09	2.115e-09		9.666e-08	9.497e-09	2.566e-08	1.803e-08			8.792e-08	1.577e-08	7.634e-09	6.774e-09			7.401e-08	1.548e-08	0	0			7.132e-09	1.469e-09	9.342e-08	9.641e-09			4.315e-08	1.957e-08		6.93e-08	2.125e-08		7.36e-08	1.128e-07		2.91e-07	1.13e-07		1.526e-07	6.519e-08		8.064e-09	6.129e-09		1.002e-07	4.301e-08
18	3.566e-08	5.197e-09	3.369e-09	3.118e-09		9.587e-08	9.605e-09	3.491e-08	2.347e-08			9.971e-08	1.806e-08	8.924e-09	7.455e-09			7.999e-08	1.649e-08	0	0			8.136e-09	1.935e-09	1.188e-07	1.161e-08			4.677e-08	2.115e-08		7.8e-08	2.373e-08		8.03e-08	1.188e-07		3.21e-07	1.19e-07		1.496e-07	6.172e-08		8.279e-09	5.95e-09		9.989e-08	4.107e-08
19	5.05e-08	7.132e-09	5.555e-09	3.477e-09		1.033e-07	9.855e-09	4.308e-08	2.856e-08			1.139e-07	1.738e-08	1.15e-08	8.243e-09			9.279e-08	1.717e-08	0	0			1.079e-08	2.079e-09	1.49e-07	1.674e-08			4.577e-08	2.075e-08		8.89e-08	2.67e-08		8.94e-08	1.284e-07		3.57e-07	1.28e-07		1.458e-07	5.731e-08		7.957e-09	5.305e-09		9.863e-08	3.957e-08
20	6.968e-08	7.419e-09	8.243e-09	4.839e-09		1.041e-07	8.601e-09	5.075e-08	3.218e-08			1.292e-07	1.796e-08	1.638e-08	1.172e-08			9.888e-08	1.864e-08	0	0			1.29e-08	2.33e-09	1.795e-07	2.322e-08			4.864e-08	2.211e-08		1.15e-07	3.236e-08		9.63e-08	1.419e-07		3.85e-07	1.42e-07		1.418e-07	5.555e-08		7.813e-09	5.233e-09		1.052e-07	4.283e-08
21	9.365e-08	9.068e-09	1.201e-08	6.201e-09		1.016e-07	7.275e-09	5.874e-08	3.555e-08			1.418e-07	1.921e-08	2.262e-08	1.62e-08			1.05e-07	1.95e-08	0	0			1.423e-08	3.226e-09	2.079e-07	3.025e-08			5.204e-08	2.233e-08		1.59e-07	4.304e-08		1.04e-07	1.428e-07		3.97e-07	1.43e-07		1.402e-07	5.165e-08		7.706e-09	4.982e-09		1.037e-07	4.179e-08
22	1.257e-07	1.301e-08	1.806e-08	8.96e-09		1.005e-07	8.422e-09	6.702e-08	3.949e-08			1.554e-07	2.247e-08	3.089e-08	2.072e-08			1.119e-07	2.118e-08	0	0			1.692e-08	3.333e-09	2.443e-07	4.398e-08			5.308e-08	2.161e-08		2.07e-07	4.874e-08		1.06e-07	1.465e-07		3.97e-07	1.47e-07		1.408e-07	5.326e-08		6.917e-09	4.158e-09		1.097e-07	4.337e-08
23	1.638e-07	1.566e-08	2.448e-08	1.154e-08		9.895e-08	7.203e-09	7.307e-08	4.046e-08			1.752e-07	2.455e-08	4.15e-08	2.889e-08			1.185e-07	2.24e-08	0	0			1.799e-08	2.831e-09	2.712e-07	5.573e-08			5.81e-08	2.19e-08		2.7e-07	5.77e-08		1.02e-07	1.517e-07		3.89e-07	1.52e-07		1.477e-07	5.473e-08		6.559e-09	3.763e-09		1.108e-07	4.408e-08
24	2.042e-07	1.788e-08	3.588e-08	1.315e-08		9.784e-08	6.738e-09	7.985e-08	4.44e-08			1.875e-07	2.634e-08	5.312e-08	3.681e-08			1.226e-07	2.147e-08	0	0			2.161e-08	2.043e-09	2.875e-07	6.34e-08			6.373e-08	2.43e-08		4.01e-07	7.752e-08		9.86e-08	1.558e-07		3.71e-07	1.56e-07		1.601e-07	5.401e-08		6.201e-09	3.943e-09		1.184e-07	4.541e-08
25	2.455e-07	1.996e-08	4.441e-08	1.71e-08		9.476e-08	8.422e-09	8.275e-08	4.225e-08			1.992e-07	2.799e-08	6.555e-08	4.512e-08			1.249e-07	2.211e-08	0	0			2.516e-08	2.007e-09	2.85e-07	6.659e-08			6.892e-08	2.495e-08		5.37e-07	1.002e-07		1.02e-07	1.51e-07		3.45e-07	1.51e-07		1.692e-07	5.24e-08		5.305e-09	2.975e-09		1.23e-07	4.494e-08
26	2.861e-07	1.921e-08	5.469e-08	1.824e-08		9.182e-08	7.813e-09	9.071e-08	4.731e-08			2.131e-07	2.627e-08	7.978e-08	5.193e-08			1.287e-07	2.29e-08	0	0			3.358e-08	4.623e-09	2.775e-07	5.928e-08			7.154e-08	2.649e-08		6.73e-07	1.193e-07		1.27e-07	1.54e-07		3.1e-07	1.54e-07		1.788e-07	5.62e-08		5.269e-09	2.796e-09		1.288e-07	4.856e-08
27	3.282e-07	2.276e-08	6.853e-08	2.351e-08		9.318e-08	7.884e-09	9.694e-08	4.806e-08			2.254e-07	2.494e-08	9.476e-08	5.975e-08			1.334e-07	2.254e-08	0	0			3.874e-08	7.061e-09	2.58e-07	5.648e-08			7.72e-08	2.71e-08		7.85e-07	1.208e-07		1.62e-07	1.483e-07		2.86e-07	1.48e-07		1.872e-07	5.315e-08		5.376e-09	2.796e-09		1.339e-07	4.692e-08
28	3.715e-07	2.405e-08	8.838e-08	2.996e-08		9.648e-08	7.92e-09	1.069e-07	5.34e-08			2.362e-07	2.426e-08	1.164e-07	6.806e-08			1.398e-07	2.118e-08	0	0			4.258e-08	7.347e-09	2.203e-07	4.781e-08			8.011e-08	2.849e-08		8.66e-07	1.112e-07		2.29e-07	1.549e-07		2.71e-07	1.55e-07		1.986e-07	5.516e-08		6.021e-09	3.333e-09		1.371e-07	4.96e-08
29	4.088e-07	2.695e-08	1.092e-07	3.369e-08		9.877e-08	6.379e-09	1.068e-07	5.024e-08			2.414e-07	2.355e-08	1.339e-07	7.197e-08			1.425e-07	2.136e-08	0	0			4.692e-08	6.917e-09	1.865e-07	3.907e-08			8.548e-08	3.183e-08		9.02e-07	1.035e-07		3.3e-07	1.549e-07		2.79e-07	1.55e-07		2.074e-07	5.627e-08		8.244e-09	4.229e-09		1.436e-07	5.046e-08
30	4.466e-07	2.631e-08	1.355e-07	4.283e-08		1.032e-07	5.053e-09	1.082e-07	5.308e-08			2.481e-07	2.394e-08	1.534e-07	7.455e-08			1.5e-07	1.953e-08	0	0			5.218e-08	7.67e-09	1.624e-07	3.462e-08			8.953e-08	3.767e-08		9.34e-07	9.171e-08		4.32e-07	1.518e-07		2.95e-07	1.52e-07		2.24e-07	6.122e-08		1.204e-08	7.491e-09		1.474e-07	5.279e-08
31	4.812e-07	2.613e-08	1.652e-07	4.774e-08		1.115e-07	4.301e-09	1.026e-07	4.953e-08			2.498e-07	2.312e-08	1.688e-07	7.774e-08			1.467e-07	1.702e-08	0	0			6.77e-08	1.283e-08	1.499e-07	3.43e-08			9.405e-08	4.179e-08		9.46e-07	8.515e-08		5.04e-07	1.42e-07		3.15e-07	1.42e-07		2.403e-07	5.881e-08		1.563e-08	9.892e-09		1.505e-07	5.179e-08
32	5.068e-07	2.043e-08	2.067e-07	6.082e-08		1.259e-07	4.193e-09	9.662e-08	4.577e-08			2.46e-07	2.269e-08	1.795e-07	7.494e-08			1.512e-07	1.473e-08	0	0			7.874e-08	1.441e-08	1.411e-07	3.426e-08			9.928e-08	4.426e-08		9.33e-07	7.49e-08		5.48e-07	1.401e-07		3.33e-07	1.4e-07		2.636e-07	6.24e-08		1.67e-08	1.129e-08		1.512e-07	5.229e-08
33	5.123e-07	1.627e-08	2.538e-07	7.1e-08		1.439e-07	4.48e-09	8.884e-08	4.225e-08			2.468e-07	2.236e-08	1.842e-07	6.924e-08			1.535e-07	1.387e-08	0	0			9.992e-08	2.007e-08	1.324e-07	3.484e-08			1.066e-07	4.76e-08		9.13e-07	6.637e-08		5.87e-07	1.301e-07		3.4e-07	1.3e-07		2.973e-07	6.362e-08		1.817e-08	1.272e-08		1.544e-07	4.91e-08
34	5.061e-07	1.233e-08	2.963e-07	8.007e-08		1.638e-07	5.34e-09	7.956e-08	3.921e-08			2.422e-07	1.975e-08	1.855e-07	6.258e-08			1.549e-07	1.315e-08	0	0			1.18e-07	2.365e-08	1.229e-07	3.627e-08			1.155e-07	4.781e-08		8.79e-07	5.756e-08		6.5e-07	1.183e-07		3.29e-07	1.18e-07		3.256e-07	6.838e-08		1.71e-08	1.226e-08		1.569e-07	4.867e-08
35	4.949e-07	1.079e-08	3.362e-07	8.491e-08		1.849e-07	6.773e-09	6.171e-08	3.251e-08			2.392e-07	1.588e-08	1.831e-07	5.91e-08			1.568e-07	1.287e-08	0	0			1.347e-07	2.645e-08	1.125e-07	3.441e-08			1.217e-07	5.258e-08		8.48e-07	5.032e-08		7.3e-07	1.058e-07		3.05e-07	1.06e-07		3.493e-07	6.709e-08		1.842e-08	1.251e-08		1.586e-07	4.688e-08
36	4.658e-07	9.641e-09	3.801e-07	8.681e-08		2.089e-07	6.343e-09	4.344e-08	2.398e-08			2.397e-07	1.491e-08	1.793e-07	5.458e-08			1.589e-07	1.355e-08	0	0			1.474e-07	2.645e-08	1.03e-07	3.247e-08			1.288e-07	5.337e-08		8.13e-07	4.365e-08		7.87e-07	9.053e-08		2.79e-07	9.05e-08		3.864e-07	6.588e-08		1.81e-08	1.183e-08		1.591e-07	4.476e-08
37	4.295e-07	9.964e-09	4.11e-07	8.408e-08		2.286e-07	6.379e-09	2.906e-08	1.573e-08			2.334e-07	1.387e-08	1.724e-07	5.104e-08			1.65e-07	1.509e-08	0	0			1.533e-07	2.444e-08	9.49e-08	3.158e-08			1.342e-07	5.674e-08		7.71e-07	4.01e-08		7.9e-07	8.756e-08		2.47e-07	8.76e-08		4.164e-07	6.58e-08		1.875e-08	1.194e-08		1.617e-07	4.304e-08
38	3.904e-07	8.566e-09	4.289e-07	8.147e-08		2.357e-07	7.024e-09	1.817e-08	8.028e-09			2.326e-07	1.29e-08	1.652e-07	5.118e-08			1.699e-07	1.398e-08	0	0			1.543e-07	2.469e-08	8.975e-08	2.864e-08			1.359e-07	5.437e-08		7.33e-07	3.211e-08		7.43e-07	8.193e-08		1.96e-07	8.19e-08		4.303e-07	6.362e-08		1.806e-08	1.039e-08		1.593e-07	3.817e-08
39	3.575e-07	7.24e-09	4.164e-07	7.795e-08		2.306e-07	6.2e-09	1.107e-08	4.587e-09			2.301e-07	1.362e-08	1.531e-07	4.788e-08			1.77e-07	1.179e-08	0	0			1.546e-07	2.09e-08	8.291e-08	2.573e-08			1.39e-07	5.29e-08		7.16e-07	2.842e-08		7.02e-07	7.48e-08		1.46e-07	7.48e-08		4.417e-07	5.874e-08		1.903e-08	9.534e-09		1.543e-07	3.462e-08
40	3.317e-07	5.842e-09	4.068e-07	7.304e-08		2.176e-07	6.451e-09	4.157e-09	2.329e-09			2.331e-07	1.29e-08	1.372e-07	4.788e-08			1.917e-07	1.036e-08	0	0			1.502e-07	1.828e-08	7.643e-08	2.201e-08			1.487e-07	5.082e-08		7.22e-07	2.33e-08		6.58e-07	7.007e-08		1.11e-07	7.01e-08		4.541e-07	5.975e-08		1.717e-08	8.172e-09		1.511e-07	3.129e-08
41	3.056e-07	5.304e-09	3.996e-07	7.125e-08		1.919e-07	4.086e-09	1.899e-09	1.649e-09			2.353e-07	1.323e-08	1.158e-07	4.279e-08			1.973e-07	8.996e-09	7.168e-11	0			1.453e-07	1.444e-08	7.142e-08	1.842e-08			1.523e-07	5.05e-08		7.29e-07	2.286e-08		5.86e-07	5.656e-08		9.66e-08	5.66e-08		4.613e-07	5.534e-08		1.821e-08	7.778e-09		1.517e-07	2.957e-08
42	2.862e-07	4.767e-09	3.854e-07	6.591e-08		1.671e-07	3.333e-09	4.659e-10	3.584e-10			2.373e-07	1.244e-08	9.372e-08	3.982e-08			2.049e-07	7.096e-09	1.004e-09	1.434e-10			1.385e-07	1.294e-08	6.624e-08	1.681e-08			1.646e-07	5.581e-08		7.24e-07	1.968e-08		5.24e-07	5.523e-08		9.05e-08	5.52e-08		4.657e-07	5.089e-08		2.143e-08	9.175e-09		1.477e-07	2.681e-08
43	2.648e-07	4.624e-09	3.678e-07	5.713e-08		1.404e-07	3.046e-09	3.584e-11	3.584e-11			2.435e-07	1.24e-08	7.053e-08	2.738e-08			2.123e-07	5.412e-09	3.656e-09	5.734e-10			1.294e-07	9.354e-09	5.674e-08	1.244e-08			1.745e-07	5.624e-08		7.11e-07	1.649e-08		4.53e-07	5.527e-08		9.6e-08	5.53e-08		4.645e-07	4.806e-08		2.523e-08	1.129e-08		1.463e-07	2.581e-08
44	2.454e-07	4.624e-09	3.377e-07	5.459e-08		1.224e-07	2.903e-09	0	0			2.459e-07	1.111e-08	4.516e-08	1.738e-08			2.194e-07	5.089e-09	8.888e-09	2.795e-09			1.201e-07	8.458e-09	4.972e-08	1.021e-08			1.859e-07	6.244e-08		6.85e-07	1.67e-08		3.95e-07	5.975e-08		1.1e-07	5.98e-08		4.641e-07	4.269e-08		2.821e-08	1.308e-08		1.476e-07	2.383e-08
45	2.224e-07	4.014e-09	3.2e-07	5.584e-08		1.06e-07	3.046e-09	0	0			2.494e-07	9.713e-09	2.953e-08	9.498e-09			2.28e-07	4.516e-09	1.731e-08	4.91e-09			1.107e-07	6.666e-09	4.054e-08	8.602e-09			1.936e-07	6.376e-08		6.82e-07	1.383e-08		3.53e-07	6.505e-08		1.2e-07	6.51e-08		4.595e-07	3.914e-08		3.147e-08	1.566e-08		1.483e-07	2.244e-08
46	2.027e-07	3.727e-09	3.022e-07	5.072e-08		9.307e-08	2.007e-09	0	0			2.411e-07	8.207e-09	1.971e-08	4.552e-09			2.437e-07	3.333e-09	3.448e-08	1.032e-08			1.04e-07	6.2e-09	3.359e-08	6.38e-09			2.01e-07	6.512e-08		6.83e-07	1.523e-08		3.07e-07	7.132e-08		1.32e-07	7.13e-08		4.549e-07	3.283e-08		3.376e-08	1.692e-08		1.522e-07	2.068e-08
47	1.942e-07	3.082e-09	2.822e-07	4.914e-08		7.684e-08	1.72e-09	0	0			2.271e-07	7.276e-09	1.305e-08	2.724e-09			2.587e-07	2.58e-09	5.401e-08	1.548e-08			9.638e-08	5.591e-09	2.819e-08	4.874e-09			2.086e-07	6.799e-08		6.77e-07	1.505e-08		2.69e-07	7.537e-08		1.5e-07	7.54e-08		4.494e-07	2.9e-08		3.477e-08	1.896e-08		1.533e-07	1.95e-08
48	1.893e-07	2.688e-09	2.629e-07	4.871e-08		6.759e-08	1.254e-09	0	0			2.158e-07	5.268e-09	7.491e-09	1.935e-09			2.823e-07	3.046e-09	7.103e-08	2.057e-08			8.903e-08	4.301e-09	2.408e-08	5.089e-09			2.182e-07	6.817e-08		6.61e-07	1.398e-08		2.34e-07	7.376e-08		1.59e-07	7.38e-08		4.428e-07	2.538e-08		3.616e-08	1.996e-08		1.529e-07	1.871e-08
49	1.854e-07	3.405e-09	2.408e-07	4.95e-08		5.498e-08	8.96e-10	0	0			2.03e-07	4.193e-09	2.079e-09	1.075e-09			2.9e-07	2.939e-09	8.906e-08	2.537e-08			7.72e-08	3.656e-09	2.117e-08	4.588e-09			2.273e-07	7.143e-08		6.06e-07	1.161e-08		2e-07	7.623e-08		1.67e-07	7.62e-08		4.266e-07	2.176e-08		3.724e-08	2.122e-08		1.511e-07	1.921e-08
50	1.835e-07	3.799e-09	2.096e-07	4.545e-08		4.293e-08	6.451e-10	0	0			1.944e-07	4.229e-09	2.509e-10	1.434e-10			2.871e-07	2.688e-09	9.82e-08	2.566e-08			6.509e-08	2.043e-09	1.879e-08	3.978e-09			2.341e-07	6.735e-08		5.53e-07	1.025e-08		1.77e-07	7.297e-08		1.72e-07	7.3e-08		4.105e-07	1.975e-08		3.778e-08	2.029e-08		1.472e-07	1.677e-08
51	1.777e-07	4.803e-09	1.637e-07	3.943e-08		3.082e-08	3.584e-10	0	0			1.866e-07	3.871e-09	0	0			2.834e-07	1.899e-09	1.125e-07	2.864e-08			5.089e-08	1.183e-09	1.609e-08	3.62e-09			2.387e-07	6.441e-08		4.99e-07	1.509e-08		1.73e-07	6.774e-08		1.58e-07	6.77e-08		3.792e-07	1.663e-08		3.738e-08	1.975e-08		1.441e-07	1.667e-08
52	1.682e-07	5.52e-09	1.246e-07	3.283e-08		1.903e-08	3.584e-11	0	0			1.801e-07	3.763e-09	0	0			2.841e-07	1.756e-09	1.279e-07	3.358e-08			4.197e-08	6.451e-10	1.368e-08	1.469e-09			2.391e-07	5.914e-08		4.47e-07	2.032e-08		1.78e-07	6.079e-08		1.4e-07	6.08e-08		3.536e-07	1.254e-08		3.441e-08	1.767e-08		1.386e-07	1.563e-08
53	1.612e-07	6.953e-09	9.892e-08	2.598e-08		1.025e-08	0	0	0			1.741e-07	3.942e-09	0	0			2.786e-07	1.147e-09	1.336e-07	3.226e-08			3.566e-08	9.319e-10	1.033e-08	8.243e-10			2.438e-07	5.559e-08		3.9e-07	8.601e-08		1.77e-07	5.917e-08		1.21e-07	5.92e-08		3.336e-07	1.129e-08		3.233e-08	1.599e-08		1.336e-07	1.444e-08
54	1.546e-07	8.709e-09	8.079e-08	2.236e-08		5.806e-09	7.168e-11	0	0			1.719e-07	3.082e-09	0	0			2.754e-07	1.398e-09	1.401e-07	3.14e-08			3.089e-08	5.735e-10	7.128e-09	1.792e-10			2.476e-07	4.857e-08		3.38e-07	3.136e-08		1.58e-07	5.204e-08		1.02e-07	5.2e-08		3.078e-07	8.673e-09		3.183e-08	1.627e-08		1.277e-07	1.312e-08
55	1.516e-07	7.742e-09	5.211e-08	1.728e-08		3.082e-09	3.584e-11	0	0			1.697e-07	2.903e-09	0	0			2.682e-07	8.96e-10	1.426e-07	3.104e-08			2.735e-08	6.093e-10	3.744e-09	3.584e-11			2.616e-07	4.452e-08		3.08e-07	2.269e-08		1.34e-07	4.423e-08		8.14e-08	4.42e-08		2.935e-07	7.957e-09		3.226e-08	1.394e-08		1.174e-07	1.021e-08
56	1.539e-07	8.602e-09	3.176e-08	1.276e-08		2.58e-09	0	0	0			1.699e-07	2.58e-09	0	0			2.657e-07	8.96e-10	1.416e-07	2.792e-08			2.279e-08	3.942e-10	7.92e-10	0			2.76e-07	4.093e-08		2.91e-07	8.171e-09		1.21e-07	4.383e-08		6.41e-08	4.38e-08		2.773e-07	5.627e-09		3.272e-08	1.244e-08		1.119e-07	8.96e-09
57	1.504e-07	5.269e-09	1.52e-08	9.211e-09		2.688e-09	0	0	0			1.712e-07	2.294e-09	0	0			2.629e-07	9.677e-10	1.394e-07	2.713e-08			1.878e-08	1.792e-10	2.88e-10	0			2.938e-07	4e-08		2.41835e-05	2.23092e-06		1.3e-07	4.036e-08		5.08e-08	4.04e-08		2.721e-07	4.229e-09		3.337e-08	1.172e-08		1.083e-07	8.638e-09
58	1.403e-07	3.011e-09	7.312e-09	6.953e-09	SUM	5.31509e-06	3.05479e-07	1.59444e-06	8.42727e-07			1.69e-07	2.58e-09	0	0			2.555e-07	1.29e-09	1.274e-07	2.283e-08			9.605e-09	0	1.8e-10	0			2.951e-07	3.634e-08					1.6e-07	3.717e-08		4.31e-08	3.72e-08		2.669e-07	3.907e-09		3.387e-08	1.143e-08		1.052e-07	8.028e-09
59	1.168e-07	1.254e-09	6.272e-09	3.333e-09								1.602e-07	3.907e-09	0	0			2.522e-07	9.318e-10	1.146e-07	2.197e-08			5.018e-09	5.376e-10	3.6e-11	0			2.934e-07	3.491e-08		0.0922497			1.79e-07	3.828e-08		4.77e-08	3.83e-08		2.552e-07	5.018e-09		3.405e-08	1.011e-08		1.006e-07	6.881e-09
60	9.706e-08	1.004e-09	8.136e-09	2.652e-09	Ratio	0.0574739		0.528542				1.492e-07	3.871e-09	0	0			2.493e-07	6.81e-10	9.981e-08	1.645e-08			3.19e-09	6.81e-10	1.44e-10	0			2.875e-07	3.538e-08					2.06e-07	3.53e-08		5.21e-08	3.53e-08		2.393e-07	4.301e-09		3.305e-08	1.047e-08		9.544e-08	5.304e-09
61	8.197e-08	1.362e-09	9.57e-09	2.616e-09								1.368e-07	5.376e-09	0	0			2.384e-07	3.942e-10	7.906e-08	1.14e-08			2.186e-09	8.96e-10	3.6e-11	0			2.81e-07	3.459e-08					2.35e-07	3.498e-08		5.2e-08	3.5e-08		2.215e-07	3.333e-09		3.183e-08	9.928e-09		8.498e-08	4.122e-09
62	6.946e-08	4.158e-09	8.208e-09	3.082e-09								1.222e-07	6.38e-09	0	0			2.323e-07	7.168e-11	5.795e-08	6.236e-09			1.434e-09	4.301e-10	7.2e-11	0			2.69e-07	2.928e-08					2.67e-07	3.645e-08		5.23e-08	3.65e-08		2.022e-07	3.046e-09		2.961e-08	9.068e-09		7.609e-08	3.763e-09
63	5.369e-08	4.229e-09	5.376e-09	2.688e-09								1.13e-07	7.67e-09	0	0			2.255e-07	3.584e-11	4.283e-08	3.584e-09			1.039e-09	2.509e-10	3.6e-11	0			2.621e-07	2.358e-08					3e-07	4.437e-08		5.68e-08	4.44e-08		1.804e-07	2.401e-09		2.842e-08	7.204e-09		6.885e-08	2.903e-09
64	4.186e-08	3.907e-09	5.233e-09	2.688e-09								1.053e-07	6.81e-09	0	0			2.207e-07	2.15e-10	3.297e-08	1.362e-09			3.584e-10	1.434e-10	0	0			2.469e-07	2.244e-08					3.31e-07	4.193e-08		6.55e-08	4.19e-08		1.573e-07	1.792e-09		2.591e-08	6.738e-09		6.258e-08	1.756e-09
65	3.251e-08	3.226e-09	5.233e-09	2.581e-09								1.024e-07	5.663e-09	0	0			2.182e-07	4.301e-10	2.606e-08	5.376e-10			1.075e-10	0	2.52e-10	0			2.303e-07	1.735e-08					3.58e-07	4.512e-08		7.11e-08	4.51e-08		1.367e-07	1.613e-09		2.226e-08	5.09e-09		5.473e-08	1.9e-09
66	2.53e-08	3.118e-09	4.229e-09	2.616e-09								9.885e-08	5.053e-09	0	0			2.138e-07	2.509e-10	2.05e-08	5.018e-10			3.584e-11	0	4.68e-10	0			2.14e-07	1.584e-08					3.8e-07	4.33e-08		6.9e-08	4.33e-08		1.172e-07	1.039e-09		1.824e-08	4.337e-09		5.018e-08	1.541e-09
67	1.943e-08	1.971e-09	3.011e-09	3.011e-09								9.648e-08	4.982e-09	3.584e-11	3.584e-11			2.052e-07	1.792e-10	1.383e-08	3.226e-10		SUM	3.04308e-06	3.81296e-07	4.88135e-06	1.00511e-06			2.023e-07	1.491e-08					4.04e-07	4.416e-08		6.23e-08	4.42e-08		1.029e-07	8.243e-10		1.595e-08	2.724e-09		4.19e-08	1.219e-09
68	1.638e-08	1.469e-09	1.756e-09	1.792e-09								9.279e-08	3.727e-09	1.792e-10	3.584e-11			1.979e-07	7.168e-11	7.706e-09	1.792e-10									1.911e-07	1.448e-08					4.14e-07	4.193e-08		5.18e-08	4.19e-08		8.982e-08	4.659e-10		1.194e-08	2.33e-09		3.391e-08	5.376e-10
69	1.358e-08	7.527e-10	1.685e-09	2.079e-09								8.892e-08	2.007e-09	5.734e-10	1.792e-10			1.778e-07	3.584e-11	3.226e-09	0		Ratio	0.125299		0.205908				1.789e-07	1.462e-08					4.08e-07	1.46e-07		1.46e-07	1.46e-07		7.684e-08	3.226e-10		9.856e-09	2.007e-09		2.727e-08	3.226e-10
70	1.276e-08	9.319e-10	2.007e-09	3.011e-09								8.695e-08	1.828e-09	6.093e-10	1.075e-10			1.494e-07	3.584e-11	6.451e-10	3.584e-11									1.732e-07	1.072e-08					4.09e-07	1.393e-07		1.39e-07	1.39e-07	SUM	1.83823e-05	3.9205e-06		8.925e-09	1.792e-09	SUM	8.14467e-06	2.35232e-06
71	9.82e-09	7.885e-10	3.871e-09	3.656e-09								8.569e-08	1.649e-09	7.885e-10	1.075e-10			1.231e-07	7.168e-11	0	0									1.658e-07	1.136e-08					3.99e-07	1.366e-07		1.37e-07	1.37e-07					9.462e-09	2.186e-09
72	7.097e-09	7.168e-10	5.34e-09	5.304e-09								8.333e-08	1.004e-09	8.602e-10	1.434e-10			1.015e-07	7.168e-11	3.584e-11	0									1.6e-07	8.172e-09					3.92e-07	1.225e-07		1.23e-07	1.23e-07	Ratio	0.213276			1.125e-08	2.079e-09	Ratio	0.288817
73	4.193e-09	3.584e-10	7.132e-09	5.699e-09								7.695e-08	1.29e-09	6.81e-10	3.584e-11			7.215e-08	0	0	0									1.528e-07	6.989e-09					3.64e-07	1.061e-07		1.06e-07	1.06e-07					1.237e-08	2.079e-09
74	2.294e-09	1.434e-10	7.455e-09	5.161e-09								6.81e-08	1.613e-09	4.301e-10	3.584e-11			4.268e-08	0	0	0									1.475e-07	5.555e-09					3.21e-07	9.982e-08		9.98e-08	9.98e-08					1.254e-08	1.971e-09
75	1.075e-09	1.792e-10	6.846e-09	4.408e-09								6.089e-08	1.792e-09	7.526e-10	1.075e-10			2.534e-08	0	0	0									1.378e-07	3.656e-09					2.68e-07	9.233e-08		9.23e-08	9.23e-08					1.179e-08	1.254e-09
76	3.584e-11	0	7.312e-09	4.408e-09								5.537e-08	1.577e-09	8.243e-10	1.434e-10			1.512e-08	0	0	0									1.3e-07	2.366e-09					2.05e-07	8.19e-08		8.19e-08	8.19e-08					1.211e-08	1.219e-09
77	0	0	8.924e-09	4.767e-09								5.061e-08	6.81e-10	1.075e-09	3.942e-10			8.996e-09	0	0	0									1.245e-07	1.685e-09					1.51e-07	6.706e-08		6.71e-08	6.71e-08					1.104e-08	9.677e-10
78	0	0	9.247e-09	5.089e-09								4.645e-08	4.301e-10	9.318e-10	2.867e-10		SUM	1.13721e-05	6.36227e-07	1.94203e-06	4.03201e-07									1.197e-07	1.613e-09					9.01e-08	5.007e-08		5.01e-08	5.01e-08					1.057e-08	1.004e-09
79	0	0	8.1e-09	5.233e-09								3.985e-08	2.509e-10	1.434e-09	2.509e-10															1.2e-07	1.183e-09					5.25e-08	4.072e-08		4.07e-08	4.07e-08					1.194e-08	1.004e-09
80	1.867e-08	1.867e-08	5.34e-09	4.086e-09								3.623e-08	7.168e-11	1.147e-09	1.792e-10		Ratio	0.0559464		0.207618										1.247e-07	1.29e-09					4e-08	2.541e-08		2.54e-08	2.54e-08					1.426e-08	1.685e-09
81	1.889e-08	1.889e-08	7.8876e-06	1.86966e-06								3.412e-08	1.434e-10	4.659e-10	0															1.316e-07	1.9e-09					3.65e-08	1.867e-08		1.87e-08	1.87e-08					1.713e-08	2.186e-09
82	2.104e-08	2.104e-08										3.172e-08	1.434e-10	4.301e-10	0															1.369e-07	2.688e-09					3.44e-08	1.889e-08		1.89e-08	1.89e-08					1.882e-08	2.581e-09
83	2.796e-08	2.796e-08	0.237038									3.021e-08	1.075e-10	6.093e-10	1.075e-10															1.36e-07	3.512e-09					3.12e-08	2.104e-08		2.1e-08	2.1e-08					1.871e-08	3.799e-09
84	3.115e-08	3.115e-08										3.086e-08	3.584e-11	6.451e-10	7.168e-11															1.318e-07	3.835e-09					2.96e-08	2.796e-08		2.8e-08	2.8e-08					1.778e-08	5.125e-09
SUM	1.18451e-05	6.09299e-07										3.276e-08	3.584e-11	1.004e-09	2.509e-10															1.29e-07	4.516e-09					3.66e-08	3.115e-08		3.12e-08	3.12e-08					1.86e-08	4.373e-09
												3.742e-08	0	8.243e-10	1.075e-10															1.294e-07	4.337e-09				SUM	2.05456e-05	6.86815e-06	SUM	1.26484e-05	6.8701e-06					2.05e-08	4.48e-09
Ratio	0.0514391											4.469e-08	2.867e-10	8.96e-10	2.15e-10															1.249e-07	3.441e-09														2.165e-08	4.373e-09
											SUM	1.10919e-05	7.34259e-07	3.00768e-06	1.29634e-06															1.216e-07	3.154e-09				Ratio	0.334288		Ratio	0.54316						2.229e-08	3.728e-09
																														1.186e-07	3.118e-09														2.211e-08	4.265e-09
											Ratio			0.431011																1.101e-07	4.552e-09														1.993e-08	3.369e-09
												0.0661978																		1.02e-07	5.699e-09														1.638e-08	3.011e-09
																														9.391e-08	5.591e-09														1.351e-08	2.545e-09
																														9.208e-08	4.767e-09														1.047e-08	1.685e-09
																														8.889e-08	4.767e-09														8.781e-09	1.29e-09
																														8.469e-08	3.047e-09														8.387e-09	8.96e-10
																														7.684e-08	1.362e-09														7.813e-09	4.659e-10
																														7.193e-08	1.649e-09														7.419e-09	4.301e-10
																														7.054e-08	1.183e-09														8.1e-09	3.943e-10
																														6.867e-08	8.96e-10														8.96e-09	4.659e-10
																														7.222e-08	1.183e-09														1.118e-08	9.677e-10
																														7.742e-08	8.602e-10														1.527e-08	1.434e-09
																														8.301e-08	7.527e-10														1.918e-08	1.649e-09
																														9.082e-08	5.018e-10														2.161e-08	1.649e-09
																														9.509e-08	5.735e-10														2.265e-08	1.756e-09
																														9.91e-08	5.018e-10														2.337e-08	2.043e-09
																														9.871e-08	3.943e-10														2.297e-08	1.828e-09
																														9.623e-08	9.319e-10														2.201e-08	1.434e-09
																														9.609e-08	8.96e-10														2.057e-08	1.183e-09
																													SUM	1.36287e-05	2.36376e-06														1.8025e-06	6.57171e-07
																													Ratio	0.17344
																																													0.364588
[truncated: 7 more columns]

## Sheet: Fig3BFH
Fig 3B
	Voltage	Control					mm					shRNA
	-30	2.40303	4.53186	3.18058	2.98602	3.94205	2.1095	2.15469	3.58852	3.38984	4.70611	0.285152	0.112405	0.834709	0.309371	0.591837
	-20	6.18481	3.8858	2.83082	2.56475	3.47632	2.45874	3.1748	3.71429	3.33898	5.55037	0.680957	0.620496	0.768467	0.698272	0.742528
	-10	5.91459	3.31315	2.52846	2.15098	2.87793	2.2897	3.00224	3.46874	3.10466	4.5991	0.787665	0.76198	0.786975	0.770778	0.953248
	0	4.92419	2.81104	2.25174	1.77714	2.35186	2.1372	2.68129	3.23592	2.86099	3.77046	0.624841	0.888369	0.731827	0.593473	1.06073
	10	3.89506	2.36687	1.97392	1.42352	1.90876	1.94587	2.22683	3.01623	2.6123	2.10029	0.40262	0.832072	0.666149	0.410485	1.17615
Fig 3F
	ctr	mm	sh14
	1.00524	0.984293	0.397906
	1.02618	1.00524	0.397906
	1.08901	0.942408	0.418848
	0.942408	1.04712	0.586387
	0.984293	0.963351	0.502618
	0.900524	0.984293	0.52356
	0.921466	0.921466	0.314136
	1.04712	1.04712	0.376963
	1.02618	1.15183	0.397906
	0.942408	0.942408	0.397906
	1.10995	1.10995	0.460733
	1.00524	1.04712	0.460733
Fig 3H
		Ctr				mm					kd
	1	0.414938	0.738462	0.505025	0.380353	0.535294	0.493369	0.480638	0.662983	0.727545	0.777778	0.695418	0.506173	0.532258	0.574419
	2	0.443645	0.480769	0.535545	0.434272	0.641196	0.587079	0.488064	0.508599	0.65	0.57732	0.506083	0.505085	0.454768	0.605825
	3	0.428571	0.422939	0.634961	0.651917	0.513382	0.502994	0.537433	0.621622	0.497487	0.781818	0.511312	0.696275	0.477322	0.340845
	4	0.371921	0.449857	0.600462	0.481793	0.451991	0.506596	0.492789	0.577617		0.471429	0.551515	0.545842	0.454545	0.523148

## Sheet: Fig4C
Fig 4C
			wt										mm												kd
		1 AP	6.18131	10.118	5.21881	5.0331	8.48833	6.62116	7.57658	6.2573	3.94429	4.02727	4.7943	3.67408	6.56119	6.62503	6.40459	4.08098	2.84319	7.77026	6.15943	5.65897	7.37787	7.84085	1.68029	2.67942	5.10056	0	1.03768	6.25915	2.49709	3.22992	2.54951	2.41257	4.58304	2.12513	3.18856
		5 AP	13.4894	6.57233	5.01811	4.17542	7.56528	10.2001	5.66252	7.36951	3.4803	3.28409	7.53156	5.0694	8.20967	5.54408	6.87622	6.67957	4.29371	8.38346	3.40072	4.53237	7.55076	6.03868	1.95676	0.636082	2.43344	0	0.455761	4.22824	0.861543	2.63424	2.10892	2.15272	4.72012	1.01711	2.34284
		20 AP	10.2523	10.9319	13.7017	7.72712	7.29449	7.13652	9.39073	4.98558	5.88246	4.22615	11.4624	6.9115	9.76483	5.79892	10.6751	7.12013	5.06472	8.46597	3.32586	3.04583	7.09488	10.2009	1.75499	1.90744	3.32714	0	0.908185	2.66964	4.17854	2.13602	2.74438	1.74216	5.99269	2.88343	2.28565

## Sheet: Fig5ABCD
Fig 5A
	CvE	trials (x100)	kd								Ctr								mm
		1	0.610101	0.80763	0.781413	0.572115	0.626275	0.505682	0.526786	0.712885	0.78417	0.583834	0.675231	0.780312	0.509588	0.470443	0.6	0.528846	0.559424	0.530998	0.567308	0.824167	0.730892	0.498199	0.569805	0.523284
		2	0.758929	0.90202	0.925325	0.708333	0.837374	0.67627	0.712967	0.734645	0.918367	0.921212	0.827731	0.891304	0.76395	0.560897	0.92	0.570048	0.928744	0.92775	0.833333	0.83	0.87963	0.59	0.67	0.817633
		3	0.742869	0.903252	0.979871	0.837135	0.940776	0.770908	0.925926		0.945833	0.949519	0.943182	0.903846	0.88	0.711342	0.903045		0.980769	0.964286	0.842737	0.834149	0.765706	0.757576	0.866883	0.967391
		4		0.990741	0.958333		0.92		0.989796		0.916667	0.914815	0.990909	0.977273	0.841448		0.891819		0.989583	0.949796	0.850697	0.960172				0.894231
	AAvEB			kd								Ctr								mm
		5	5	0.716287	0.82778	0.78884	0.53766	0.84	0.568182	0.881953	0.801887	0.956522	0.92776	0.794872	0.959984	0.979167	0.643429	0.507403	0.748397	0.878351	0.934783	0.968687	0.575758	0.670455	0.877551	0.75	0.540306
		6	6	0.883814	0.99	0.948873	0.75	0.969388	0.611383	0.981132	0.932323	0.972727	0.980392	1	0.96	0.941506	0.920368	0.789843	0.806891	0.950483	0.946429	0.956981	0.990741	0.786058	0.971154	0.959596	0.689614
		7	7	0.888889	0.969551	0.949519	0.99	0.835737	0.869968	0.966102	0.989796	0.975	0.967391	1	0.969388	0.98	0.958132	0.911526	0.76409	0.922276	0.988636	1	0.966667	0.886792	0.959984	0.990196	0.753513
		8	8	0.956897	0.98913	0.989796	0.990385	0.988636	0.829787	0.988889	0.990909	0.981132	1	1	0.991071	0.964912	0.980392	1	0.826931	0.990196	0.979992	1	0.990385	0.943994	0.947917	0.991379	0.738636
		9	9	0.963636	1	0.972222	1	0.925926	0.797276	0.979592	0.974138	0.965909	0.981132	1	0.933962	0.952093	0.983333	0.989796	0.864407	0.96875	0.99	1	1	0.930972	0.969002	0.977778	0.854167
		10	10	0.97	0.980392	0.990196	0.988636	0.981818	0.901561	0.970188	0.990741	0.98913	0.96757	0.968687	0.98913	0.928972	0.939614	1	0.874749	0.972222	0.991379	1	0.990566	0.951923	0.973214	1	0.816727
		11	11	0.981481	1	0.991071	1	1	0.917468	0.990385	0.979592	0.933962	0.990741	0.989796	0.990741	0.95	0.969289	0.978723	0.944444	1	0.989362	1	0.989583	0.962264	0.959984	0.990909	0.930972
		12	12	0.971154	1	0.980769	1	0.99	0.931035	0.969289	0.98	0.969002	0.979167	0.988889	1	0.9796	0.9796	0.969388	0.898305	0.959596	0.989583	1	1	0.96	0.990909	0.967391	0.897727
		13	13	0.970588	0.990566	1	1	0.988889	0.93	0.979746	0.990741	0.970131	0.99	0.990385	0.981132	0.951923	0.972727	0.976744	0.815262	0.979444	1	1	1	0.969796	0.99	0.98913	0.854167
	6/4v6/4			kd								Ctr								mm
				0.574519	0.587035	0.49	0.521277	0.520808	0.570617	0.53	0.5	0.497565	0.5	0.521609	0.736451	0.553994	0.502435	0.608974	0.4876	0.503284	0.561688	0.560356	0.593437	0.612121	0.469968	0.478084	0.47379
		14	14	0.556423	0.722802	0.532213	0.72	0.593635	0.528611	0.56383	0.510204	0.512846	0.551821	0.719551	0.785829	0.532213	0.481818	0.555222	0.54	0.583333	0.575321	0.681891	0.838418	0.639101	0.597239	0.582833	0.57
		15	15	0.611587	0.931373	0.620942	0.831723	0.78	0.583233	0.763745	0.602441	0.806303	0.665657	0.787026	0.805958	0.62505	0.593437	0.777915	0.620202	0.68	0.569712	0.863636	0.929145	0.910564	0.765706	0.776167	0.74
		16	16	0.820728	0.872727	0.806006	0.959184	0.87	0.713768	0.766026	0.785859	0.784023	0.77	0.861378	0.909091	0.69	0.690705	0.81	0.754516	0.77484	0.734243	0.989796	0.950505	0.850242	0.873746	0.815937	0.7
		17	17	0.89984	0.819528	0.875	0.952525	0.930572	0.818555	0.919071	0.87	0.895145	0.900641	0.882212	0.927083	0.846618	0.857372	0.795664	0.848485	0.884615	0.772988	0.97	0.966667	0.930195	0.954545	0.907005	0.741096
		18	18	0.846563	0.873363	0.85	0.949592	0.931091	0.787594	0.835925	0.855155	0.873872	0.866817	0.859388	0.979746	0.969592	0.820139	0.863748	0.757793	0.778799	0.802707	0.98	0.989583	0.971154	0.959388	0.921031	0.753478
		19	19	0.882979	0.796474	0.885387	0.979992	0.921266	0.73399	0.944716	0.85	0.854708	0.828531	0.81	0.952922	0.901442	0.910564	0.859098	0.907051	0.9	0.834343	0.990196	0.957576	0.959742	0.991379	0.86876	0.857086
		20	20	0.891667	0.884183	0.808703	0.964286	0.94938	0.860306	0.970612	0.862825	0.876026	0.838736	0.857143	0.971698	0.921095	0.91	0.951122	0.889756	0.801686	0.834135	0.989583	1	0.959936	0.980769	0.923324	0.871795
		21	21	0.892157	0.879545	0.878478	0.979167	0.980392	0.847006	0.942593	0.82963	0.887959	0.897709	0.867959	0.969108	0.938596	0.950706	0.979501	0.918571	0.890931	0.89	0.958333	1	0.969796	0.98	0.959796	0.912963
	AAvEB			kd								Ctr								mm
		22	22	1	1	0.989796	0.990196	0.991525	0.973684	1	0.957447	1	1	0.974576	0.991379	0.989583	1	0.988636	0.914894	1	0.987805	1	1	1	1	0.979475	0.946809
		23	23	1	1	0.99	1	1	0.989796	1	0.92623	0.98913	0.980769	0.979592	1	1	0.980392	0.988889	0.94898	1	1	1	1	0.9375	1	1	0.928571
		24	24	1	0.980769	0.981481	0.989362	0.990385	0.980392	0.990909	0.959184	1	0.98913	0.967391	1	1	1	0.977273	0.894737	1	1	0.980392	0.99	0.990196	0.979167	0.990741	0.884615
		25	25	1	0.990909	1	1	1	0.960784	1	0.886792	0.990385	1	0.938596	1	1	0.991071	0.991228	0.981481	0.989583	0.979798	0.989796	1	0.982759	0.989796	0.989796	0.826931
		26	26	1	0.941176	0.981132	1	1	0.98	0.980392	0.901786	0.931818	0.989796	0.992157	1	0.972727	0.968085	0.94898	0.946809	0.989796	1	1	1	1	0.978723	0.967391	0.893617
	6/4v6/4			kd								Ctr								mm
		27	27	0.79952	0.812925	0.772381	0.7	0.806891	0.641457	0.8	0.766106	0.587662	0.704167	0.584848	0.800725	0.670361	0.728261	0.834135	0.62	0.793718	0.707683	0.808912	0.73	0.745994	0.742456	0.832533	0.721598
		28	28	0.958333	0.893429	0.811111	0.944444	0.836957	0.767162	0.95283	0.916667	0.718344	0.778846	0.763136	0.958333	0.880609	0.81955	0.88	0.872565	0.913131	0.912686	0.981132	0.94	0.87234	0.959984	0.989796	0.890556
		29	29	0.948873	0.941414	0.911765	0.958333	0.863321	0.849436	0.970353	0.894928	0.851047	0.831542	0.878019	0.950422	0.93	0.897959	0.922075	0.907051	0.980392	0.908654	0.981132	0.972727	0.977273	0.959984	1	0.906061
		30	30	0.971698	1	0.927885	0.97	0.872149	0.901961	0.970588	0.962963	0.9	0.90625	0.909764	1	0.950483	0.951923	0.959584	0.907868	1	0.93	0.980392	0.989796	0.931554	0.970494	0.969289	0.919711
		31	31	1	0.977778	0.951626	0.981481	0.95098	0.933575	0.981481	0.989362	0.989362	0.934343	0.95	0.979992	0.94	0.94978	0.980769	0.957447	0.98913	0.970713	0.948013	0.98	0.96757	0.969551	1	0.904255
		32	32	0.981481	1	0.979796	0.98913	0.877551	0.924003	0.979167	0.959592	0.988372	0.98913	0.930147	0.970588	1	0.95847	0.988636	0.94898	1	0.945652	0.990566	1	0.988372	0.979592	0.989796	0.906481
Fig 5B		AAvEB					6/4v6/4					AAvEB					6/4v6/4
			kd	Ctr	mm			kd	Ctr	mm			kd	Ctr	mm			kd	Ctr	mm
			0.758929	0.956819	0.956819			0.889241	0.873971	0.862762			1	0.977124	0.99331			0.984277	0.957143	0.996454
			0.996815	0.970588	0.970588			0.853154	0.854545	0.852158			0.971519	0.993151	0.993307			0.992958	0.94493	0.948236
			0.990566	0.989726	0.989726			0.8584	0.844863	0.980065			0.987421	0.931818	0.990196			0.953266	0.929866	0.973443
			0.969551	0.989883	0.989883			0.973485	0.964161	0.986305			0.996795	1	0.996667			0.979978	0.983441	0.989932
			0.993056	0.990566	0.990566			0.95004	0.919659	0.963287			0.996815	0.989655	0.990566			0.900595	0.963199	0.96348
			0.949519	0.988636	0.988636			0.821326	0.891353	0.983392			0.973684	0.986667	0.982639			0.92236	0.953465	0.972961
			1	1	1			0.953059	0.896343	0.91521			0.990566	0.973333	0.983221			0.977124	0.976064	0.986622
			0.983347	0.884033	0.884033			0.845211	0.918571	0.880391			0.914557	0.939873	0.86831			0.969955	0.939732	0.912056
Fig 5C		AAvEB					6/4v6/4					AAvEB					6/4v6/4
			kd	Ctr	mm			kd	Ctr	mm			kd	Ctr	mm			kd	Ctr	mm
			355.505	280	315.58			456	400	320			344.571	320	260			379.2	316	325
			271.171	286.5	267.118			338.889	320	304.571			276.304	280	276.972			316	284	259.2
			338.151	332.128	267.118			475.028	308	320			305.333	272.8	280			379	233	324
			286.818	307.7	321.49			352.387	360	400			293.217	276	280			384	334	292.8
			274.998	284.585	176.611			332.04	318	297.6			304.064	292.387	298.93			312.8	308	388
			312.06	300	300.24			416	300	316			316.908	320	272.468			344.83	320	312.04
			271.058	332.128	288			560	396	320			372.8	272.8	348			376	324	308
			374.78	238.459	316.088			414.961	265	364.571			316	300	260			424	296	186
Fig 5D		AAvEB					6/4v6/4					AAvEB					6/4v6/4
			kd	Ctr	mm			kd	Ctr	mm			kd	Ctr	mm			kd	Ctr	mm
			26.58	14.47	22.72			19.91	14.35	18.52			17.05	12.87	14.05			14.94	12.6	12.07
			13.41	24.97	19.79			14.47	23.78	21.57			14.24	15.44	19.25			11.71	17.48	22.76
			13.83	14.75	14.04			18.5	17.99	13.35			11.39	13.26	13.96			13.45	12.33	16.21
			17.02	14.77	13.68			16.18	15.89	10.95			13.55	12.34	11.99			11.54	12.38	10.81
			15.36	15.91	13.01			20.45	13.06	14.62			13.56	13.34	12.3			10.01	11.96	12.46
			20.24	13.01	26.75			16.75	15.06	17.68			14.64	14.26	21			17.05	14.25	13.72
			10.95	20.52	12.56			13.4	12.72	16.82			10.38	12.17	11.13			11.1	11.26	14.08
			11.93	20.73	11.94			29.22	14.45	12.54			14.54	13.78	13.99			12.81	12.57	13.32

## Sheet: S3 FigCF
S3 Fig C
	Voltage	Bath solution				Phrixotoxin-3				TTX
	-30	4.18287	2.90263	3.82731	5.17819	1.44379	1.90086	0.665408	0.0759022	0.23759	0.121354	0.177152
	-20	3.62419	2.82344	4.05062	4.81064	1.23506	1.63634	0.983639	0.0911694	0.296375	0.192082	0.223357
	-10	2.99179	2.3538	3.63225	4.347	0.99915	1.33476	1.027	0.117928	0.236354	0.430308	0.194803
	0	2.43067	1.87491	3.24017	3.85517	0.799806	1.05042	0.986273	0.147369	0.152121	0.468633	0.325181
	10	1.96606	1.36436	2.71718	3.43534	0.90219	0.75479	0.960677	0.162255	0.056572	0.427047	0.285692
S3 Fig F
		Bath solution				Phrixotoxin-3				TTX
	-40	8.69104	14.5601	9.61535	5.72369	7.62778	15.7918	5.34539	0.122273	1.40449	0.415422	0	0.172284
	-30	8.49944	13.4995	12.4728	11.3314	7.24462	15.6593	10.8362	3.11357	1.3487	0.407782	0	0.301105
	-20	7.36101	12.3101	17.0614	11.9736	6.19333	14.8761	10.7468	4.47487	1.54211	0.533336	0	0.661196
	-10	6.07821	11.2449	16.5909	11.3012	5.10715	13.7434	10.1812	4.42044	1.4614	1.1643	0.031357	1.0974
	0	4.87501	10.1099	15.412	10.4122	4.05098	12.722	9.48833	4.2495	1.10581	2.15446	0.79079	1.56108
	10	3.79562	9.04809	14.1008	9.35449	3.04308	11.5713	8.65475	4.02753	0.586498	3.20179	1.29396	1.6411

## Sheet: S4 FigBCDE
S4 Fig B
		WT						shRNA #5
	-70	0	0	0	0	0	0	0	0	0	0	0	0
	-60	0	0	0	0	0	0	0	0	0	0	0	0
	-50	0	0	0	0	0	0	0	0	0	0	0	0
	-40	-0.208281	-0.30375	-0.24125	-4.89625	-0.307812	-2.69563	-0.230625	-0.17375	-0.254687	-0.2725	-0.161719	-2.10625
	-30	-2.40469	-4.46406	-4.13219	-4.37656	-3.49969	-5.67313	-1.33219	-0.71	-0.347563	-0.85626	-0.200859	-0.30125
	-20	-4.60719	-4.93438	-3.5	-3.81531	-4.77781	-5.02562	-2.30297	-0.697969	-0.548313	-3.93609	-1.69328	-1.53844
	-10	-4.75984	-4.2425	-2.97625	-3.26469	-4.32594	-4.15031	-2.10063	-0.683906	-0.570313	-3.52703	-1.45766	-1.95781
	0	-4.02328	-3.41812	-2.51875	-2.78187	-3.55781	-3.485	-1.75047	-0.652656	-0.632688	-2.84813	-1.20828	-1.64
	10	-2.32406	-2.54969	-2.06844	-2.36594	-2.76469	-2.83406	-1.42094	-0.620156	-0.690437	-2.14672	-0.977031	-1.15906
S4 Fig C
		WT						shRNA #14
	-70	0	0	0	0	0	0	0	0	0	0	0	0
	-60	0	0	0	0	0	0	0	0	0	0	0	0
	-50	0	0	0	0	0	0	0	0	0	0	0	0
	-40	-0.208281	-0.30375	-0.24125	-4.89625	-0.307812	-2.69563	-0.227188	-0.381563	-0.456563	-0.1	-0.11375	-0.110313
	-30	-2.40469	-4.46406	-4.13219	-4.37656	-3.49969	-5.67313	-0.285152	-0.112405	-0.834709	-0.309371	-0.591837	-0.92719
	-20	-4.60719	-4.93438	-3.5	-3.81531	-4.77781	-5.02562	-0.680957	-0.620496	-0.768467	-0.698272	-0.742528	-0.49094
	-10	-4.75984	-4.2425	-2.97625	-3.26469	-4.32594	-4.15031	-0.787665	-0.76198	-0.786975	-0.770778	-0.953248	-0.6875
	0	-4.02328	-3.41812	-2.51875	-2.78187	-3.55781	-3.485	-0.624841	-0.888369	-0.731827	-0.593473	-1.06073	-0.68937
	10	-2.32406	-2.54969	-2.06844	-2.36594	-2.76469	-2.83406	-0.40262	-0.832072	-0.666149	-0.410485	-1.17615	-0.33563
S4 Fig D
		WT						shRNA #22
	-70	0	0	0	0	0	0	0	0	0	0	0	0
	-60	0	0	0	0	0	0	0	0	0	0	0	0
	-50	0	0	0	0	0	0	0	0	0	0	0	0
	-40	-0.208281	-0.30375	-0.24125	-4.89625	-0.307812	-2.69563	-0.218125	-0.275625	-0.348438	-0.2225	-0.269062	-0.433125
	-30	-2.40469	-4.46406	-4.13219	-4.37656	-3.49969	-5.67313	-2.46906	-0.358125	-0.484688	-0.29125	-0.293125	-1.58656
	-20	-4.60719	-4.93438	-3.5	-3.81531	-4.77781	-5.02562	-2.10687	-0.440938	-0.600625	-0.655938	-0.327187	-1.76437
	-10	-4.75984	-4.2425	-2.97625	-3.26469	-4.32594	-4.15031	-1.825	-0.51375	-0.826877	-0.831875	-0.655938	-1.61719
	0	-4.02328	-3.41812	-2.51875	-2.78187	-3.55781	-3.485	-1.55687	-0.58625	-0.874687	-0.754687	-0.64875	-1.60875
	10	-2.32406	-2.54969	-2.06844	-2.36594	-2.76469	-2.83406	-1.34187	-0.64875	-0.927187	-0.809687	-0.611563	-1.74656e-09
S4 Fig E
		WT						shRNA #44
	-70	0	0	0	0	0	0	0	0	0	0	0	0
	-60	0	0	0	0	0	0	0	0	0	0	0	0
	-50	0	0	0	0	0	0	0	0	0	0	0	0
	-40	-0.208281	-0.30375	-0.24125	-4.89625	-0.307812	-2.69563	-0.226875	-0.171875	-0.28125	-0.865625	-0.292812	-0.131875
	-30	-2.40469	-4.46406	-4.13219	-4.37656	-3.49969	-5.67313	-0.313437	-0.447813	-2.40469	-1.38406	-2.97969	-0.216875
	-20	-4.60719	-4.93438	-3.5	-3.81531	-4.77781	-5.02562	-1.95719	-2.41594	-2.43625	-3.00594	-2.67313	-1.3825
	-10	-4.75984	-4.2425	-2.97625	-3.26469	-4.32594	-4.15031	-1.66187	-2.02781	-2.11313	-2.70687	-2.24687	-2.42219
	0	-4.02328	-3.41812	-2.51875	-2.78187	-3.55781	-3.485	-1.39062	-1.63906	-1.77812	-2.22781	-1.87625	-2.18687
	10	-2.32406	-2.54969	-2.06844	-2.36594	-2.76469	-2.83406	-1.18531	-1.28625	-1.45906	-1.64969	-1.62625	-1.67469

## Sheet: S6 FigDEGH
S6 Fig DE						S6 Fig G
GCL soma eGFP positive sizes							Ctr					mm					kd
		8.04					586	498	619	587	552	356	518	472	424	382	370	567	650	627	682
		8.56					599	570	560	577	521	370	482	481	488	364	580	593	389	578	653
		6.52					478	409	558	497	581	540	548	508	359	546	286	564	441	567	355
		6.32					449	443	530	499		547	552	506	708		369	472	525	530	602
		6.67
		7.23
		8.97				S6 Fig H
		7.88					Ctr					mm					kd
		7.5					0.822526	0.65261	0.642972	0.67632	0.813406	0.955056	0.727799	0.930085	0.853774	0.874345	0.681081	0.654321	0.623077	0.692185	0.630498
		5.69					0.69616	0.638597	0.753571	0.738302	0.773513	0.813514	0.738589	0.783784	0.834016	0.769231	0.836207	0.693086	0.758355	0.707612	0.788668
		8.07					0.629707	0.682152	0.697133	0.682092	0.8537	0.761111	0.914234	0.736221	0.824512	0.728938	0.769231	0.783688	0.791383	0.816578	1
		8.53					0.904232	0.78781	0.816981	0.715431		0.780622	0.686594	0.822134	0.782486		0.94851	0.699152	0.893333	0.74717	0.717608
		7.44
		6.74
		7.57
		7.79
		7.89
		7.83
		8.42
		5.29
		6.21
		7.18
		15.63
		6.18
		12.69
		6.29
		5.29
		8.94
		5.77
		7.43
		7.5
		7.77
		6.32
		7.03
		6.68
		7.84
		7.7
		8.28
		7.82
		7.95
		7.16
		5.82
		6.88
		7.47
		7.26
		5.94
		5.67
		801
		7.17
		8.59
		10.16
		7.32
		6.7
		6.25
		8.4
		7.44
		16
		6.7
		6.32
		7.62
		6.49
		9.48
		8.73
		7.78
		5.47
		6.25
		5.51
		6.32
		7.62
		6.33
		7.31
		7.2
		7.08
		8.34
		8.07
		7.91
		9.67
		8.17
		13.28
		8.25
		7.15
		7.67
		7.36
		7.82
		7.1
		6.7
		7.91
		6.59
		12.56
		5.71
		5.29
		8.25
		8.06
		7.82
		7.68
		7.56
		7.82
		7.68
		7.47
		7.15
		7.31
		11.08
		6.53
		6.59
		6.7
		7.03
		7.48
		6.15
		6.15
		8.7
		13.04
		7.48
		7.92
		7.86
		7.92
		6.87
		6.59
		11.33
		6.48
		10.98
		7.67
		8.84
		8.39
		7.77
		8.39
		8.29
		7.86
		7.77
		7.82
		6.48
		7.15
		6.83
		6.83
		8.25
		5.97
		5.91
		7.48
		5.59
		7.2
		7.77
		8.36
		7.92
		8.07
		7.82
		6.33
		5.01
		7.68
		8.07
		7.1
		7.92
		5.97
		7.15
		7.48
		8.29
		6.39
		6.87
		7.2
		6.59
		7.2
		8.1
		7.86
		8.7
		6.59
		5.29
		6.59
		7.48
		5.59
		6.86
		6.29
		5.97
		6.48
		5.5
		13.18
		7.1
		6.94
		7.15
		15.96
		9.67
		7.27
		6.82
		8.01
		8.01
		4.48
		6.59
		5.73
		6.29
		5.86
		6.84
		13.1
		8.33
		9.01
		5.97
		6.15
		5.97
		7.27
		6.82
		6.15
		7.03
		9.05
		7.03
		7.31
		7.48
		6.59
		14.76
		8.07
		6.86
		6.1
		6.69
		5.71
		6.15
		8.17
		8.78
		8.89
		8.07
		8.2
		7.27
		7.25
		6.21
		7.67
		10.24
		8.1
		6.53
		7.48
		6.24
		7.48
		5.36
		6.86
		5.29
		8.07
		6.33
		6.59
		5.29
		5.62
		7.15
		7.82
		5.71
		7.03
		5.12
		6.69
		6.59
		7.08
		7.47
		5.86
		6.1
		6.86
		7.56
		5.91
		7.48
		6.12
		6.21
		6.7
		7.04
		6.15
		7.03
		6.94
		6.72
		8.17
		7.24
		5.31
		7.03
		6.59
		5.71
		7.48
		6.6
		7.15
		5.29
		7.45
		7.03
		6.15
		7.03
		6.86
		6.24
		6.21
		5.63
		6.29
		6.59
		6.15
		6.59
		6.6
		6.39
		6.59
		7.04
		7.03
		7.24
		6.83
		6.53
		6.15
		6.87
		5.29
		5.62
		8.78
		7.47
		6.69
		5.97
		6.59
		5.91
		6.53
		7.82
		7.77
		6.69
		8.1
		8.53
		5.97
		6.59
		7.36
		7.08
		7.92
		7.92
		8.39
		7.31
		7.15
		7.67
		5.59
		6.87
		7.36
		8.06
		6.94
		5.73
		6.86
		8.07
		7.77
		6.94
		8.39
		7.77
		5.91
		7.1
		6.53
		6.69
		5.62
		5.83
		6.24
		7.56
		7.15
		6.24
		7.56
		7.92
		7.48
		8.07
		7.95
		7.15
		6.7
		7.15
		6.48
		7.45
		6.86
		7.45
		7.56
		6.1
		6.94
		6.1
		6.86
		7.15
		6.86
		6.94
		7.15
		6.59
		6.59
		6.83
		7.15
		7.31
		6.86
		6.69
		7.91
		7.78
		6.24
		7.48
		7.48
		5.5
		6.86
		6.59
		4.73
		6.21
		6.39
		6.24
		6.1
		8.17
		7.48
		7.15
		6.21
		7.67
		7.48
		5.71
		7.1
		7.91
		7.67
		5.01
		7.04
		6.48
		7.78
		6.94
		6.6
		5.62
		6.48
		6.43
		6.29
		6.53
		7.2
		7.67
		8.07
		7.58
		7.92
		7.03
		6.12
		5.71
		5.89
		6.24
		6.6
		6.6
		6.82
		6.15
		7.67
		7.95
		6.21
		7.08
		7.03
		7.1
		6.7
		7.04
		8.39
		5.36
		6.87
		6.12
		6.6
		7.15
		6.72
		5.31
		6.86
		5.97
		7.48
		5.91
		6.24
		7.77
		7.47
		7.77
		5.91
		7.45
		8.1
		7.56
		7.47
		6.94
		7.92
		6.33
		6.87
		6.94
		7.15
		6.21
		5.71
		7.56
		7.03
		7.04
		7.03
		6.59
		7.04
		7.15
		7.47
		7.48
		7.47
		6.16
		6.59
		6.16
		7.47
		7.04
		7.51
		3.6
		7.48
		7.2
		7.15
		7.92
		5.78
		7.48
		7.04
		7.03
		6.59
		7.91
		6.6
		7.26
		5.76
		5.96
		5.07
		6.42
		7.25
		6.09
		6.35
		6.91
		6.32
		5.87
		5.84
		6.15
		5.41
		7.29
		11.65
		5.64
		5.39
		5.59
		6.69
		6.88
		6.16
		7.44
		6.77
		6.01
		7
		6.09
		5.39
		6.32
		7.45
		6.18
		5.06
		6.27
		5.91

## Sheet: S7 FigAB
S7 Fig A
1 AP	Control	APV+CNQX		20AP	Control	APV+CNQX
	9.69105	0.463519			11.4325	1.48145
	8.77863	0.845617			14.2262	1.18862
	7.88659	1.33105			11.8556	1.61114
S7 Fig B
1 AP	Control	GABAzine		20 AP	Control	GABAzine
	7.7825	0.604459			8.74689	0.543203
	8.65077	0.918825			12.7415	0.83777
	7.55964	0.959909			13.4527	1.24763

## Sheet: S8 Fig AB
S8 Fig A
		control	mm	sh14	apv+cnqx	gabazine
		89.4675	69.3921	24.3203	6.70892	8.74886
		146.447	53.1782	38.7816	12.2393	13.299
		75.5364	94.9658	73.8249	19.2655	13.8936
		72.8485	95.8898	0
		122.859	92.6992	15.0192
		95.8338	59.0676	90.5941
		109.662	41.152	36.1426
		90.5674	112.466	46.7495
		57.0892	89.1508	36.9013
		58.2902	81.9072	34.9192
		140.267	106.786	66.3344
		127.061	113.487	30.7589
		114.15		46.1508
S8 Fig B
		wt	mm	kd	apv+cnqx	gabazine
		111.961	125.176	19.1656	16.1783	5.93211
		119.383	75.4778	20.8304	12.9804	9.14896
		149.631	106.638	36.3344	17.5946	13.6249
		84.3848	63.3277	0
		79.6603	116.579	9.91793
		77.9351	77.7562	29.1541
		102.552	55.3098	45.6322
		54.4456	92.4535	23.3266
		64.24	36.3204	29.9703
		46.1521	33.2623	19.0254
		124.85	77.4804	65.4438
		155.359	111.4	31.4888
		129.47		24.9607
